# Supplementary material
Source: PubMed Central journal article supplement (PMC6881795)
Supplement: AEM.01820-19-s0001.pdf [file AEM.01820-19-s0001.pdf]

**Metagenomic signatures of gut infection caused by different *E. coli*  
pathotypes**

Peña-González, A., Soto-Girón, M.J., Smith S., Sistrunk J., Montero L., Páez M., Ortega E.,  
Hatt J.K., Cevallos, W., Trueba G., Levy, K. and K.T. Konstantinidis

**SUPPLEMENTARY MATERIAL**

Fig. S1

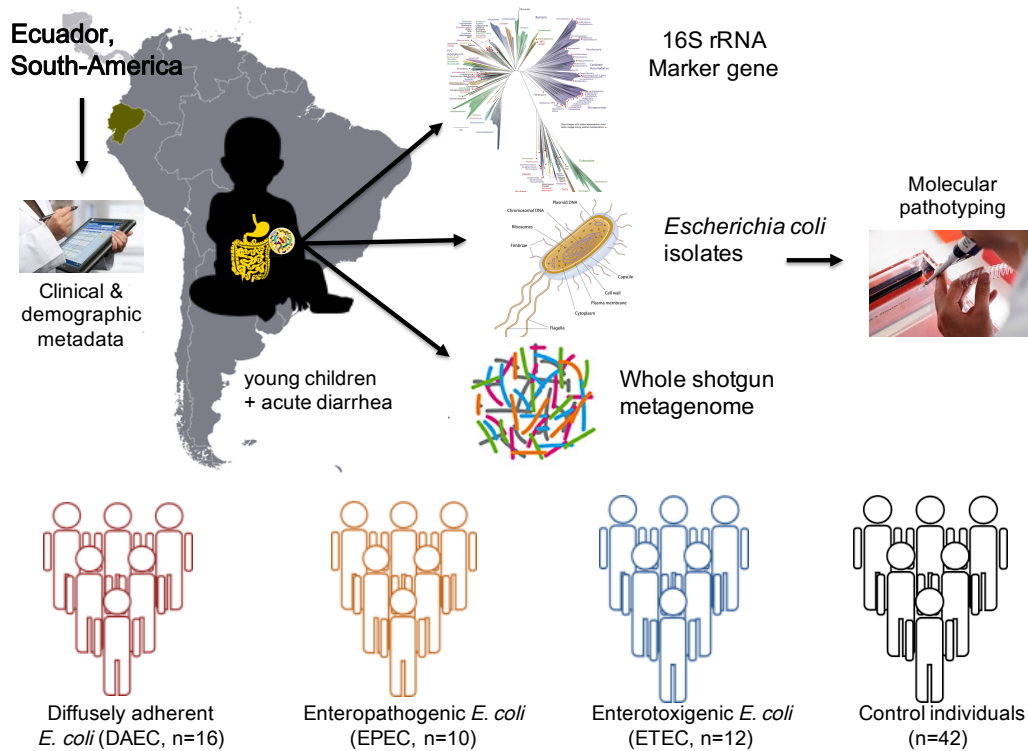

**Fig. S1. Study design.** A total of 80 young children between 1-6 years old were enrolled in this study, including 38 cases of acute diarrhea disease and 42 age-matched, control individuals. Cases included individuals visiting the clinic site with acute diarrhea (defined as three or more loose stools in a 24-hour period), and controls included individuals visiting the same clinic site for any other complaint, without diarrhea or vomiting in the prior seven days. From the cases of diarrhea, 16 individuals were PCR-positive for *afaB-I*, a virulence marker of DAEC (Diffusely Adherent *E. coli*), 10 were positive for *bfp*, a marker gene for typical EPEC (Enteropathogenic *E. coli*) and 12 were positive for *elt* and/or *stx*, marker genes of ETEC (Enterotoxigenic *E. coli*). Individuals included in control group were all PCR-negative for any of the pathotype markers characterized in this study. All 80 individuals were taxonomically screened by amplicon sequencing of the 16S rRNA marker gene, while all cases of diarrhea (n=38) and a subset of control samples (n=23) were further subjected to whole shotgun metagenomic sequencing. In addition, *E. coli* isolates isolated from stool samples in all cases of diarrhea were also sequenced for pathogenomic characterization and comparison.

Fig. S2

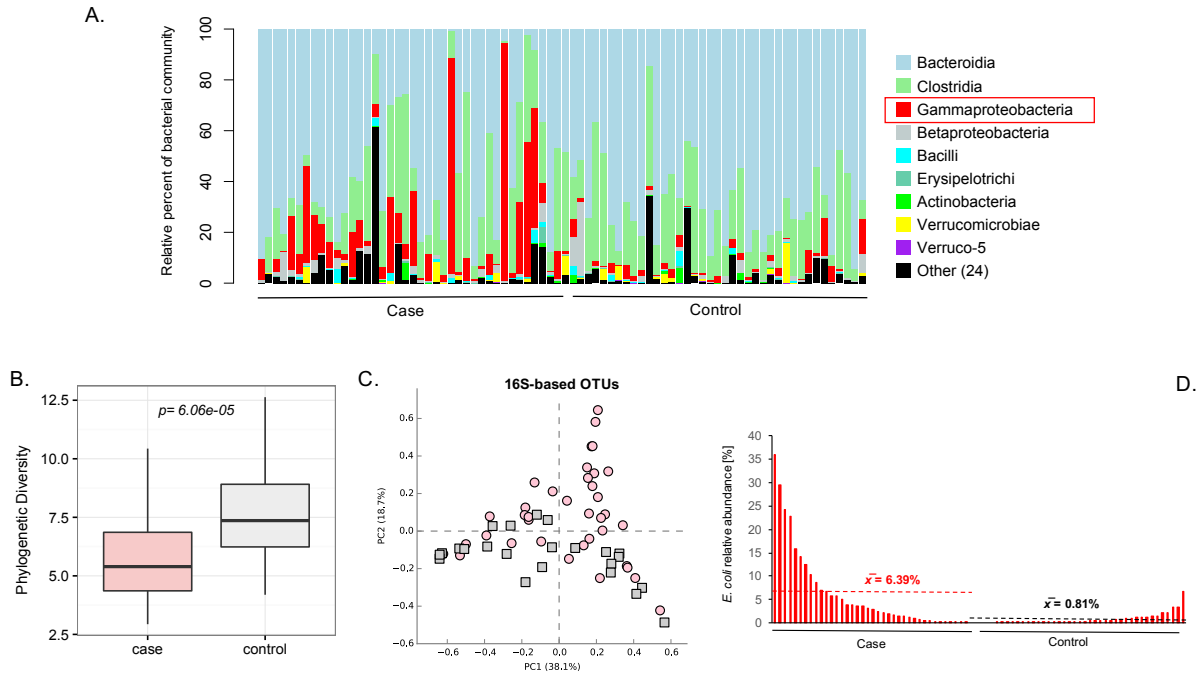

**Fig. S2. 16S rRNA gene-based microbial community composition and diversity differences between diarrhea and control samples.** Panel (A) shows the relative abundance of bacterial groups classified at the class level for diarrheal and control samples. Only the top ten most abundant phylogroups are displayed. Note that a higher abundance of *Gammaproteobacteria* was observed in diarrhea versus control groups. Panel (B) shows significant differences in Faith's phylogenetic diversity (PD) between diarrhea and control samples. Consistent with previous literature, diarrheal samples presented lower community diversity than control ones. Panel (C) represents the overall community dissimilarity based on the taxonomic composition at the genus level using Bray-Curtis dissimilarities matrix. Pink circles represent cases of diarrhea and gray squares represent control samples. Panel (D) shows the relative abundance of the 16S rRNA gene-based OTU (or sequence variant) taxonomically assigned to *E. coli*.

Fig. S3

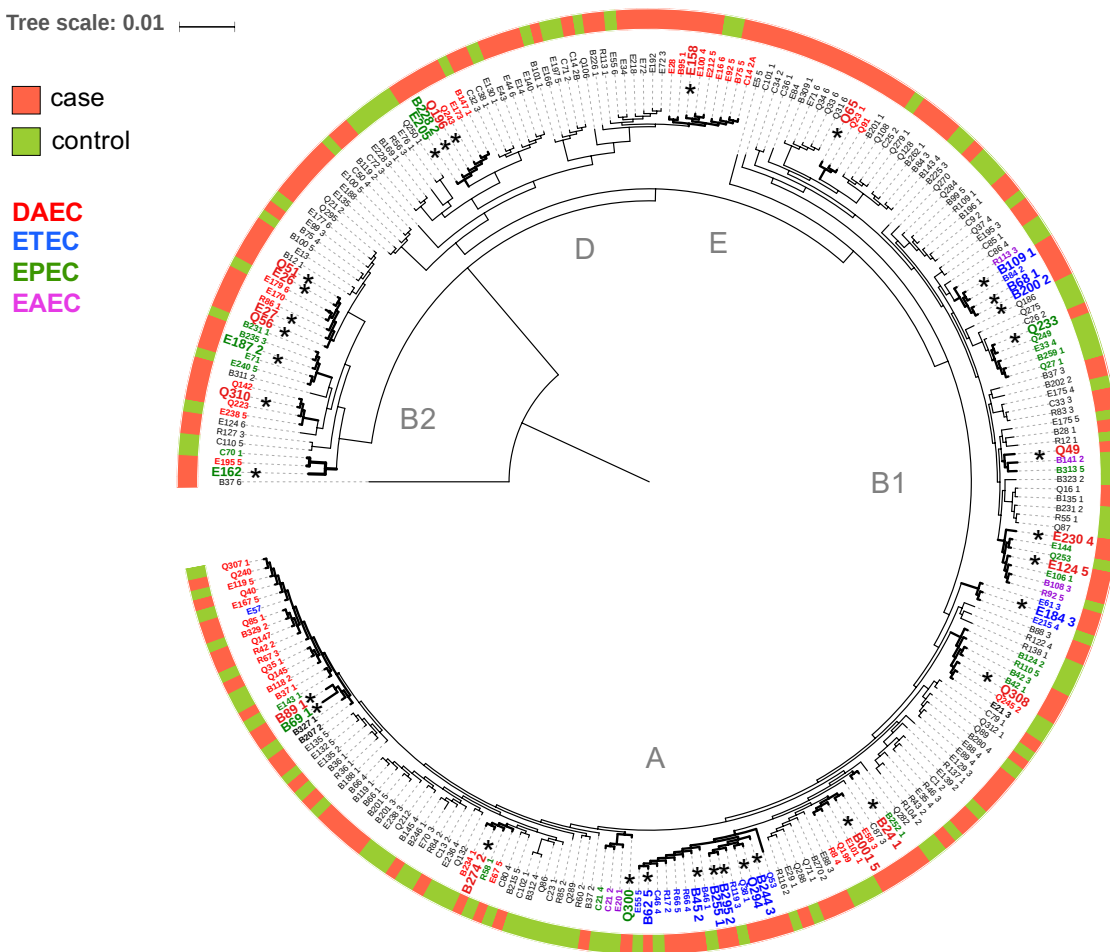

**Fig. S3. Detection of clonal complexes in core genome phylogeny.** The phylogenetic reconstruction of 263 *E. coli* strains circulating in rural and urban regions in northern Ecuador was calculated from the concatenated alignment of 1,200 core orthologous genes using FastTree 2.1.7 with the GTR model for nucleotide evolution and 1,000 SH-like local support replicates. The tree is also cross-referenced with metadata about clinical status (outer circle), showing isolates obtained from cases of diarrhea in red and control in green. Clonal complexes within the tree are bolded and the different isolate IDs are color-coded by pathotypes: red for DAEC, blue for ETEC, green for EPEC and purple for EAEC. See Materials and Methods section on how clonal complexes were identified. In addition, the isolates that are part of this study are denoted with asterisks.

**Fig. S4**

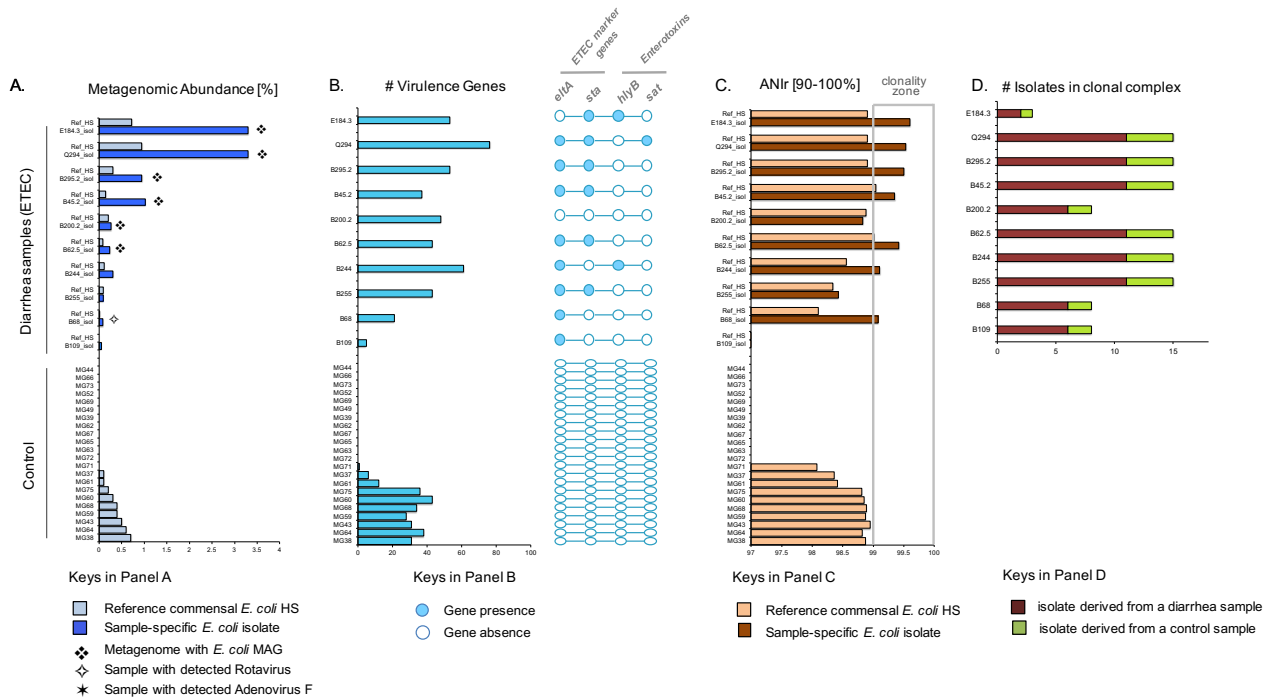

**Fig. S4. Evaluation of Enterotoxigenic *E. coli* (ETEC) as causative agent of diarrhea.** Panel (A) shows the estimated metagenomic abundance of the reference commensal *E. coli* (strain HS, in light blue), the ETEC isolate (in blue) recovered from the sample, along with the Elisa-based detection of Rotavirus (+) for each sample analyzed (rows). Samples where high-quality *E. coli* MAGs were recovered from the corresponding metagenome are denoted by a star. Panel (B) shows the number of total *E. coli* virulence genes observed in the metagenome and an array of four hallmark virulence factors including the two ETEC marker genes (*eltA* and *sta*) and two additional enterotoxins (the hemolysin subunit B (*hlyB*) and the secreted autotransporter toxin (*sat*)). Panel (C) shows the estimated *E. coli* intra-population diversity measured by ANIr of reads against the reference commensal strain HS (light orange) and the isolate obtained from the sample (dark brown). To avoid any potential bias by low *in-situ* abundance, only samples where the average sequence depth of the reference genome was  $\geq 1X$  were evaluated for ANIr. Panel (D) shows the number of isolates that originated from cases of diarrhea (in red) vs. control samples (in green) and were assigned in the same core-genome-based phylogenetic clade as the isolate (epidemiology).

**Fig. S5**

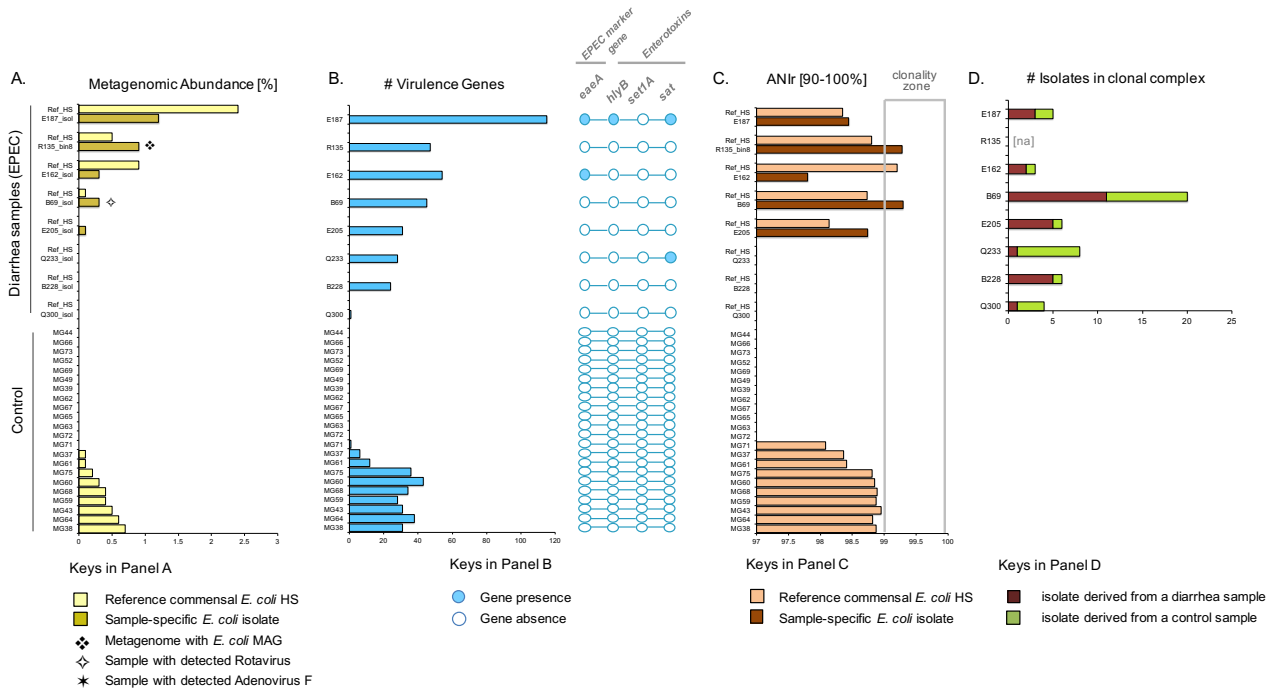

**Fig. S5. Evaluation of Enteropathogenic *E. coli* (EPEC) as causative agent of diarrhea.** Panel (A) shows the estimated metagenomic abundance of the reference commensal *E. coli* (strain HS, in light yellow), the EPEC isolate (in yellow) recovered from the sample, along with the Elisa-based detection of Rotavirus (+) for each sample analyzed (rows). Samples where high-quality *E. coli* MAGs were recovered are denoted by a star. Panel (B) shows the number of total *E. coli* virulence genes observed in the metagenome and an array of four hallmark virulence factors including the EPEC marker gene (*eaeA*, intimin) and three enterotoxins, i.e., the hemolysin subunit B (*hlyB*), the enterotoxin (*set1A*), and the secreted autotransporter toxin (*sat*). Panel (C) shows the estimated *E. coli* intra-population diversity measured by ANIr of reads against the reference commensal strain HS (light orange) and the isolate obtained from the sample (dark brown). To avoid any potential bias by low *in-situ* abundance, only samples where the average sequence depth of the reference genome was  $\geq 1X$  were evaluated for ANIr. Panel (D) shows the number of isolates that originated from cases of diarrhea (in red) vs. control samples (in green) and were assigned in the same core-genome-based phylogenetic clade as the isolate (epidemiological data).

Fig. S6

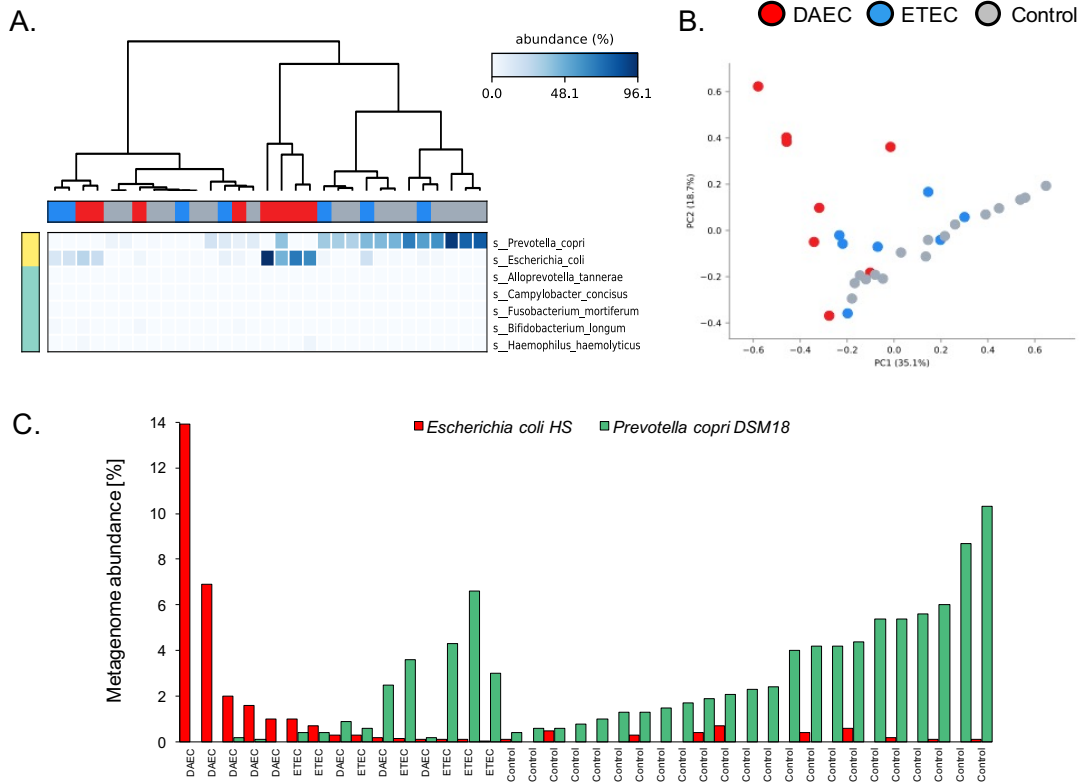

**Fig. S6. Differentially abundant taxa between *E. coli* infectious diarrheal and control samples.** Panel (A) shows a heatmap of the relative abundance of the seven significantly differentially abundant species between diarrhea and control groups for infections caused by different pathotypes based on the metagenomic data (Figures 3, S4 and S5; color-coded by pathotype as shown in the key of Panel B). Panel (B) shows a principal component analysis plot of the taxonomic relatedness of samples with pathotype infection and controls (see key). Taxonomic relatedness was assessed at the species level using clade-specific marker genes with MetaPhlan2. Panel (C) shows the estimated metagenomic abundance of *E. coli*, using strain HS as the reference commensal genome to recruit *E. coli* reads (NC\_009800.1) and *Prevotella copri*, using as reference the genome of strain DSM18205, a gut fermentative microbe (NZ\_ACBX00000000.2).

**Table S1. Description of NGS ‘omics’ datasets used in this study.** Y corresponds to ‘yes’ and N corresponds to ‘no’. These conventions denote whether or not an individual sample was processed for the specific type of analysis shown. Note that no isolate was available for samples R135 and B64 (bolded).

| Index | Sample ID | Metagenome | 16S rRNA | Isolate  | case/control | <i>E coli</i> Pathotype |
|-------|-----------|------------|----------|----------|--------------|-------------------------|
| 1     | B001      | Y          | Y        | Y        | case         | DAEC                    |
| 2     | B24       | Y          | Y        | Y        | case         | DAEC                    |
| 3     | B274      | Y          | Y        | Y        | case         | DAEC                    |
| 4     | B89       | Y          | Y        | Y        | case         | DAEC                    |
| 5     | E124      | Y          | Y        | Y        | case         | DAEC                    |
| 6     | E158      | Y          | Y        | Y        | case         | DAEC                    |
| 7     | E230      | Y          | Y        | Y        | case         | DAEC                    |
| 8     | E26       | Y          | Y        | Y        | case         | DAEC                    |
| 9     | E27       | Y          | Y        | Y        | case         | DAEC                    |
| 10    | Q196      | Y          | Y        | Y        | case         | DAEC                    |
| 11    | Q308      | Y          | Y        | Y        | case         | DAEC                    |
| 12    | Q310      | Y          | Y        | Y        | case         | DAEC                    |
| 13    | Q49       | Y          | Y        | Y        | case         | DAEC                    |
| 14    | Q51       | Y          | Y        | Y        | case         | DAEC                    |
| 15    | Q56       | Y          | Y        | Y        | case         | DAEC                    |
| 16    | Q65       | Y          | Y        | Y        | case         | DAEC                    |
| 17    | B228      | Y          | Y        | Y        | case         | EPEC                    |
| 18    | B56       | Y          | Y        | Y        | case         | EPEC                    |
| 19    | B69       | Y          | Y        | Y        | case         | EPEC                    |
| 20    | E162      | Y          | Y        | Y        | case         | EPEC                    |
| 21    | E187      | Y          | Y        | Y        | case         | EPEC                    |
| 22    | E205      | Y          | Y        | Y        | case         | EPEC                    |
| 23    | Q233      | Y          | Y        | Y        | case         | EPEC                    |
| 24    | Q300      | Y          | Y        | Y        | case         | EPEC                    |
| 25    | R126      | Y          | Y        | Y        | case         | EPEC                    |
| 26    | R135      | Y          | Y        | <b>N</b> | case         | EPEC                    |
| 27    | B109      | Y          | Y        | Y        | case         | ETEC                    |
| 28    | B200      | Y          | Y        | Y        | case         | ETEC                    |
| 29    | B244      | Y          | Y        | Y        | case         | ETEC                    |
| 30    | B255      | Y          | Y        | Y        | case         | ETEC                    |
| 31    | B295      | Y          | Y        | Y        | case         | ETEC                    |
| 32    | B45       | Y          | Y        | Y        | case         | ETEC                    |
| 33    | B62       | Y          | Y        | Y        | case         | ETEC                    |
| 34    | B64       | Y          | Y        | <b>N</b> | case         | ETEC                    |



|    |       |   |   |   |         |      |
|----|-------|---|---|---|---------|------|
| 35 | B68   | Y | Y | Y | case    | ETEC |
| 36 | E184  | Y | Y | Y | case    | ETEC |
| 37 | Q294  | Y | Y | Y | case    | ETEC |
| 38 | Q53   | Y | Y | Y | case    | ETEC |
| 39 | Q101  | Y | Y | N | control | NEG  |
| 40 | Q105  | Y | Y | N | control | NEG  |
| 41 | Q116  | Y | Y | N | control | NEG  |
| 42 | Q127  | Y | Y | N | control | NEG  |
| 43 | Q131  | Y | Y | N | control | NEG  |
| 44 | Q157  | Y | Y | N | control | NEG  |
| 45 | Q158  | Y | Y | N | control | NEG  |
| 46 | R0015 | Y | Y | N | control | NEG  |
| 47 | R0022 | Y | Y | N | control | NEG  |
| 48 | R0026 | Y | Y | N | control | NEG  |
| 49 | R0080 | Y | Y | N | control | NEG  |
| 50 | R0081 | Y | Y | N | control | NEG  |
| 51 | R0091 | Y | Y | N | control | NEG  |
| 52 | R0105 | Y | Y | N | control | NEG  |
| 53 | R0130 | Y | Y | N | control | NEG  |
| 54 | R0134 | Y | Y | N | control | NEG  |
| 55 | R124  | Y | Y | N | control | NEG  |
| 56 | R129  | Y | Y | N | control | NEG  |
| 57 | R131  | Y | Y | N | control | NEG  |
| 58 | R25   | Y | Y | N | control | NEG  |
| 59 | R29   | Y | Y | N | control | NEG  |
| 60 | R40   | Y | Y | N | control | NEG  |
| 61 | R97   | Y | Y | N | control | NEG  |
| 62 | B027  | N | Y | N | control | NEG  |
| 63 | B103  | N | Y | N | control | NEG  |
| 64 | B104  | N | Y | N | control | NEG  |
| 65 | B213  | N | Y | N | control | NEG  |
| 66 | B22   | N | Y | N | control | NEG  |
| 67 | E131  | N | Y | N | control | NEG  |
| 68 | E141  | N | Y | N | control | NEG  |
| 69 | E156  | N | Y | N | control | NEG  |
| 70 | E17   | N | Y | N | control | NEG  |
| 71 | E204  | N | Y | N | control | NEG  |
| 72 | E21   | N | Y | N | control | NEG  |
| 73 | E23   | N | Y | N | control | NEG  |
| 74 | E56   | N | Y | N | control | NEG  |

|    |       |   |   |   |         |     |
|----|-------|---|---|---|---------|-----|
| 75 | E93   | N | Y | N | control | NEG |
| 76 | Q143  | N | Y | N | control | NEG |
| 77 | Q144  | N | Y | N | control | NEG |
| 78 | Q168  | N | Y | N | control | NEG |
| 79 | R0041 | N | Y | N | control | NEG |
| 80 | R0128 | N | Y | N | control | NEG |

**Table S2. Metagenomic yield, human content and read quality of diarrhea and control samples used in this study.** Estimates for metagenomic yield are presented for only one paired-end read (PE1). ‘HC’ stands for human read cleaning. ‘QC’ stands for quality control. Samples R126 (EPEC) and Q53 (ETEC) in red were discarded from the analysis due to low metagenomic coverage or sequencing depth.

| Index     | Sample      | case/<br>ctl | <i>E. coli</i><br>pathotype | Total PE<br>read1 | #<br>after HC  | %<br>after<br>HC | #<br>after QC  | %<br>after<br>QC | Final lib<br>size<br>(PE1) |
|-----------|-------------|--------------|-----------------------------|-------------------|----------------|------------------|----------------|------------------|----------------------------|
| 1         | B001        | case         | DAEC                        | 6,531,793         | 1,488,444      | 22.8             | 1,132,843      | 17.3             | 169M                       |
| 2         | B24         | case         | DAEC                        | 13,156,535        | 12,952,566     | 98.4             | 10,623,704     | 80.7             | 1.5G                       |
| 3         | B274        | case         | DAEC                        | 7,427,929         | 7,290,205      | 98.1             | 5,842,124      | 78.7             | 872M                       |
| 4         | B89         | case         | DAEC                        | 10,171,921        | 1,089,781      | 10.7             | 908,926        | 8.9              | 126M                       |
| 5         | E124        | case         | DAEC                        | 10,843,598        | 10,838,811     | 99.9             | 9,169,045      | 84.6             | 1.4G                       |
| 6         | E158        | case         | DAEC                        | 8,418,618         | 7,154,333      | 85.0             | 5,874,743      | 69.8             | 878M                       |
| 7         | E230        | case         | DAEC                        | 8,794,848         | 8,790,739      | 100.0            | 7,276,368      | 82.7             | 1.1G                       |
| 8         | E26         | case         | DAEC                        | 5,327,047         | 5,325,794      | 100.0            | 4,079,691      | 76.6             | 609M                       |
| 9         | E27         | case         | DAEC                        | 8,600,912         | 7,489,003      | 87.1             | 6,232,480      | 72.5             | 933M                       |
| 10        | Q196        | case         | DAEC                        | 10,565,635        | 1,114,583      | 10.5             | 846,647        | 8.0              | 123M                       |
| 11        | Q308        | case         | DAEC                        | 10,107,007        | 10,083,099     | 99.8             | 8,578,875      | 84.9             | 1.3G                       |
| 12        | Q310        | case         | DAEC                        | 6,927,136         | 6,914,116      | 99.8             | 5,376,592      | 77.6             | 805M                       |
| 13        | Q49         | case         | DAEC                        | 7,273,409         | 7,270,208      | 100.0            | 5,746,337      | 79.0             | 855M                       |
| 14        | Q51         | case         | DAEC                        | 10,549,942        | 948,390        | 9.0              | 766,198        | 7.3              | 113M                       |
| 15        | Q56         | case         | DAEC                        | 10,155,142        | 7,471,039      | 73.6             | 6,260,221      | 61.6             | 916M                       |
| 16        | Q65         | case         | DAEC                        | 8,922,179         | 6,087,254      | 68.2             | 5,074,850      | 56.9             | 759M                       |
| 17        | B228        | case         | EPEC                        | 9,257,000         | 9,220,639      | 100              | 7,785,343      | 84.1             | 1.2G                       |
| 18        | B56         | case         | EPEC                        | 10,822,204        | 9,224,643      | 85               | 7,593,577      | 70.2             | 1.1G                       |
| 19        | B69         | case         | EPEC                        | 7,542,022         | 7,518,431      | 100              | 6,113,656      | 81.1             | 909M                       |
| 20        | E162        | case         | EPEC                        | 6,938,905         | 4,948,559      | 71               | 3,997,479      | 57.6             | 598M                       |
| 21        | E187        | case         | EPEC                        | 9,032,039         | 8,537,949      | 95               | 7,158,475      | 79.3             | 1.1G                       |
| 22        | E205        | case         | EPEC                        | 7,036,190         | 7,034,607      | 100              | 5,384,029      | 76.5             | 811M                       |
| 23        | Q233        | case         | EPEC                        | 8,942,343         | 8,941,264      | 100              | 7,252,948      | 81.1             | 1.1G                       |
| 24        | Q300        | case         | EPEC                        | 9,834,934         | 9,772,091      | 99               | 8,233,965      | 83.7             | 1.2G                       |
| <b>25</b> | <b>R126</b> | <b>case</b>  | <b>EPEC</b>                 | <b>11,185,025</b> | <b>404,832</b> | <b>4</b>         | <b>316,760</b> | <b>2.8</b>       | <b>47M</b>                 |

|           |            |             |             |              |              |              |            |           |            |
|-----------|------------|-------------|-------------|--------------|--------------|--------------|------------|-----------|------------|
| 26        | R135       | case        | EPEC        | 10,490,440   | 4,523,998    | 43           | 3,866,783  | 36.9      | 581M       |
| 27        | B109       | case        | ETEC        | 9,192,633    | 9,189,530    | 99.9         | 7,675,507  | 83.5      | 1.2G       |
| 28        | B200       | case        | ETEC        | 12,509,793   | 12,494,918   | 99.9         | 10,313,659 | 82.4      | 1.5G       |
| 29        | B244       | case        | ETEC        | 8,295,416    | 7,134,222    | 86           | 5,775,817  | 69.6      | 862M       |
| 30        | B255       | case        | ETEC        | 9,856,355    | 9,854,564    | 99.9         | 8,432,852  | 85.6      | 1.3G       |
| 31        | B295       | case        | ETEC        | 7,378,814    | 7,376,611    | 99.9         | 5,930,153  | 80.4      | 888M       |
| 32        | B45        | case        | ETEC        | 11,491,641   | 11,487,903   | 99.9         | 9,823,847  | 85.5      | 1.4G       |
| 33        | B62        | case        | ETEC        | 8,850,080    | 8,845,711    | 99.9         | 7,358,733  | 83.1      | 1.1G       |
| 34        | B64        | case        | ETEC        | 8,999,675    | 8,990,531    | 99.9         | 7,637,068  | 84.9      | 1.1G       |
| 35        | B68        | case        | ETEC        | 8,218,792    | 7,986,605    | 97           | 6,509,243  | 79.2      | 964M       |
| 36        | E184       | case        | ETEC        | 6,314,505    | 6,287,420    | 100          | 5,175,784  | 82.0      | 771M       |
| 37        | Q294       | case        | ETEC        | 13,322,967   | 13,312,996   | 100          | 11,105,678 | 83.4      | 1.7G       |
| <b>38</b> | <b>Q53</b> | <b>case</b> | <b>ETEC</b> | <b>1,286</b> | <b>1,213</b> | <b>94.32</b> | <b>388</b> | <b>32</b> | <b>49K</b> |
| 39        | Q105       | control     | NEG         | 5,377,446    | 5,375,319    | 99.96        | 4,016,518  | 74.69     | 1.2G       |
| 40        | Q127       | control     | NEG         | 7,778,804    | 7,776,111    | 99.97        | 6,304,665  | 81.05     | 1.9G       |
| 41        | Q158       | control     | NEG         | 7,502,883    | 7,501,382    | 99.98        | 5,800,986  | 77.32     | 1.7G       |
| 42        | Q116       | control     | NEG         | 8,405,358    | 8,402,475    | 99.97        | 6,737,952  | 80.16     | 2G         |
| 43        | Q157       | control     | NEG         | 6,500,061    | 6,495,920    | 99.94        | 5,136,050  | 79.02     | 1.5G       |
| 44        | Q101       | control     | NEG         | 9,119,586    | 9,117,396    | 99.98        | 7,822,285  | 85.77     | 2.3G       |
| 45        | Q131       | control     | NEG         | 7,899,998    | 7,897,301    | 99.97        | 6,472,827  | 81.93     | 1.9G       |
| 46        | R15        | control     | NEG         | 8,506,033    | 8,442,959    | 99.26        | 6,998,463  | 82.28     | 2.1G       |
| 47        | R22        | control     | NEG         | 7,069,379    | 7,066,763    | 99.96        | 5,426,039  | 76.75     | 1.6G       |
| 48        | R26        | control     | NEG         | 7,603,692    | 7,601,120    | 99.97        | 6,394,649  | 84.10     | 1.9G       |
| 49        | R80        | control     | NEG         | 7,055,082    | 7,052,399    | 99.96        | 5,731,005  | 81.23     | 1.7G       |
| 50        | R81        | control     | NEG         | 6,062,506    | 6,060,167    | 99.96        | 5,026,868  | 82.92     | 1.5G       |
| 51        | R91        | control     | NEG         | 9,315,213    | 9,313,429    | 99.98        | 7,569,775  | 81.26     | 2.2G       |
| 52        | R105       | control     | NEG         | 9,295,732    | 9,292,607    | 99.97        | 7,799,973  | 83.91     | 2.3G       |
| 53        | R130       | control     | NEG         | 9,161,454    | 9,161,060    | 99.99        | 7,756,239  | 84.66     | 2.3G       |
| 54        | R134       | control     | NEG         | 9,271,545    | 9,270,609    | 99.99        | 7,793,289  | 84.06     | 2.3G       |
| 55        | R124       | control     | NEG         | 8,928,121    | 8,925,587    | 99.97        | 7,258,528  | 81.30     | 2.1G       |
| 56        | R129       | control     | NEG         | 7,789,512    | 7,788,783    | 99.99        | 6,659,108  | 85.49     | 2G         |
| 57        | R131       | control     | NEG         | 7,470,866    | 7,459,793    | 99.85        | 6,145,847  | 82.26     | 1.8G       |
| 58        | R25        | control     | NEG         | 10,159,250   | 10,157,817   | 99.99        | 8,966,203  | 88.26     | 2.7G       |
| 59        | R29        | control     | NEG         | 7,547,198    | 7,546,293    | 99.99        | 6,386,418  | 84.62     | 1.9G       |
| 60        | R40        | control     | NEG         | 8,606,454    | 8,606,023    | 99.99        | 7,255,722  | 84.31     | 2.2G       |
| 61        | R97        | control     | NEG         | 10,513,556   | 10,486,995   | 99.75        | 8,803,096  | 83.73     | 2.6G       |

**Table S3. General genome assembly statistics of *E. coli* isolates and MAGs recovered from diarrheal samples.** 'PATH' denotes pathotype group. Size is measured in Mbp. 'CONTG' corresponds to the number of assembled contigs. 'GC' corresponds to GC percent. 'COMP' denotes the estimated completeness percent of the isolate or MAG and 'CONT' corresponds to contamination percent. Isolates B56 and R126 in red were discarded from further analysis due to high contamination.

| SAMPLE ID  | PATH        | TYPE           | SIZE       | CONTG       | GC          | N50         | COVERAGE   | COMP        | CONT        |
|------------|-------------|----------------|------------|-------------|-------------|-------------|------------|-------------|-------------|
| Q56_BIN2   | DAEC        | MAG            | 4.9        | 113         | 50.7        | 146837      | 82.4X      | 99.59       | 1.27        |
| E230_BIN3  | DAEC        | MAG            | 5.2        | 149         | 50.5        | 131672      | 90.9X      | 99.12       | 1.01        |
| Q196_BIN1  | DAEC        | MAG            | 4.9        | 541         | 51.8        | 20774       | 23.4X      | 97.1        | 1.85        |
| E124_BIN9  | DAEC        | MAG            | 4.7        | 244         | 51.3        | 34664       | 16.7X      | 96.91       | 0.99        |
| Q51_BIN1   | DAEC        | MAG            | 4.1        | 1516        | 50.4        | 1516        | 25X        | 70.3        | 3.6         |
| Q65_BIN3   | DAEC        | MAG            | 4.6        | 286         | 50.8        | 36969       | 76.7X      | 96.24       | 2.78        |
| E158_BIN1  | DAEC        | MAG            | 3.7        | 861         | 51.9        | 6609        | 123X       | 76.23       | 2.06        |
| R135_BIN8  | EPEC        | MAG            | 4.9        | 961         | 51.1        | 8631        | 11X        | 95.21       | 2.84        |
| B45_BIN12  | ETEC        | MAG            | 4.6        | 179         | 50.9        | 52598       | 18.6X      | 98.84       | 0.55        |
| B295_BIN5  | ETEC        | MAG            | 5.1        | 465         | 51.2        | 26676       | 12.3X      | 97.99       | 3.78        |
| E184_BIN4  | ETEC        | MAG            | 4.7        | 530         | 51.1        | 16705       | 32.3X      | 94.37       | 2.6         |
| B62_BIN13  | ETEC        | MAG            | 4.3        | 1343        | 51.8        | 2835        | 6.3X       | 70.2        | 5           |
| B200_BIN15 | ETEC        | MAG            | 4.4        | 720         | 51.3        | 10164       | 12.X       | 93.24       | 1.98        |
| Q294_BIN5  | ETEC        | MAG            | 4.3        | 611         | 51.1        | 13230       | 71X        | 90.93       | 2.48        |
| B001_5     | DAEC        | Isolate        | 5.1        | 257         | 50.5        | 61824       | 32X        | 99.1        | 0.99        |
| B24_1      | DAEC        | Isolate        | 4.8        | 253         | 49.7        | 55219       | 162X       | 98.6        | 1.06        |
| B274_2     | DAEC        | Isolate        | 4.9        | 254         | 50          | 59071       | 335X       | 98.87       | 0.63        |
| B89_1      | DAEC        | Isolate        | 4.8        | 194         | 50.6        | 68348       | 89X        | 98.35       | 0.42        |
| E124_5     | DAEC        | Isolate        | 5.1        | 204         | 50.53       | 86732       | 36X        | 99.47       | 1.1         |
| E158       | DAEC        | Isolate        | 5.2        | 202         | 50.59       | 77037       | 27X        | 99.56       | 0.84        |
| E230_4     | DAEC        | Isolate        | 5.8        | 1630        | 50          | 5050        | 40X        | 91.89       | 8.29        |
| E26        | DAEC        | Isolate        | 5.3        | 206         | 50.44       | 105975      | 28X        | 99.45       | 1.62        |
| E27        | DAEC        | Isolate        | 5.1        | 142         | 50.2        | 103201      | 87X        | 99.59       | 0.92        |
| Q196       | DAEC        | Isolate        | 5.1        | 309         | 50.42       | 34191       | 17X        | 99.24       | 0.59        |
| Q308       | DAEC        | Isolate        | 4.9        | 192         | 50.66       | 66199       | 31X        | 99.2        | 0.74        |
| Q310       | DAEC        | Isolate        | 5          | 205         | 50.54       | 59022       | 27X        | 99.17       | 0.78        |
| Q49        | DAEC        | Isolate        | 5          | 173         | 50.59       | 111283      | 28X        | 99.43       | 0.48        |
| Q51        | DAEC        | Isolate        | 5.2        | 252         | 50.52       | 55381       | 17X        | 99.51       | 1.65        |
| Q56        | DAEC        | Isolate        | 5          | 137         | 50.63       | 118040      | 22X        | 99.5        | 1.1         |
| Q65        | DAEC        | Isolate        | 5.1        | 1223        | 50.07       | 6466        | 28X        | 92.74       | 4.6         |
| B228_2     | EPEC        | Isolate        | 5.1        | 192         | 49.7        | 80361       | 428X       | 99.47       | 0.69        |
| <b>B56</b> | <b>EPEC</b> | <b>Isolate</b> | <b>7.1</b> | <b>2675</b> | <b>50.8</b> | <b>3195</b> | <b>66X</b> | <b>88.3</b> | <b>61.3</b> |
| B69_1      | EPEC        | Isolate        | 4.8        | 168         | 449.6       | 66315       | 78X        | 98.82       | 0.23        |
| E162       | EPEC        | Isolate        | 4.7        | 148         | 50.65       | 89603       | 23X        | 99.47       | 0.39        |

|               |             |                |            |            |             |              |            |             |             |
|---------------|-------------|----------------|------------|------------|-------------|--------------|------------|-------------|-------------|
| <b>E187</b>   | EPEC        | Isolate        | 5          | 298        | 50.3        | 42003        | 38X        | 98.52       | 0.57        |
| <b>E205</b>   | EPEC        | Isolate        | 4.5        | 131        | 50.58       | 64835        | 27X        | 99.17       | 0.3         |
| <b>Q233</b>   | EPEC        | Isolate        | 4.8        | 625        | 50.42       | 13401        | 12X        | 97.27       | 1.46        |
| <b>Q300</b>   | EPEC        | Isolate        | 4.5        | 131        | 49.6        | 64835        | 64X        | 99.17       | 0.3         |
| <b>R126</b>   | <b>EPEC</b> | <b>Isolate</b> | <b>5.3</b> | <b>141</b> | <b>54.8</b> | <b>92131</b> | <b>35X</b> | <b>88.9</b> | <b>19.7</b> |
| <b>B109_1</b> | EPEC        | Isolate        | 4.7        | 403        | 50.5        | 22016        | 17X        | 99.19       | 0.73        |
| <b>B200_2</b> | EPEC        | Isolate        | 4.8        | 245        | 50.63       | 42883        | 19X        | 99.34       | 0.37        |
| <b>B244_3</b> | EPEC        | Isolate        | 4.8        | 201        | 48.3        | 66123        | 289X       | 99.34       | 0.55        |
| <b>B255_1</b> | EPEC        | Isolate        | 4.7        | 246        | 48.7        | 49462        | 167X       | 98.64       | 0.39        |
| <b>B295_2</b> | EPEC        | Isolate        | 4.7        | 255        | 48.6        | 49462        | 118X       | 98.37       | 0.39        |
| <b>B45</b>    | EPEC        | Isolate        | 4.8        | 318        | 50.6        | 30625        | 26X        | 98.34       | 0.66        |
| <b>B62_5</b>  | EPEC        | Isolate        | 4.8        | 274        | 50.5        | 43727        | 140X       | 98.96       | 0.55        |
| <b>B68_1</b>  | EPEC        | Isolate        | 4.7        | 200        | 49.5        | 64686        | 352X       | 99.38       | 0.74        |
| <b>E184_3</b> | EPEC        | Isolate        | 5          | 182        | 49.7        | 88848        | 46X        | 99.52       | 1.29        |
| <b>Q294</b>   | EPEC        | Isolate        | 4.8        | 215        | 50.52       | 53151        | 25X        | 98.64       | 0.56        |
| <b>Q53</b>    | EPEC        | Isolate        | 5.2        | 1611       | 50.1        | 43.03        | 18X        | 88.57       | 7.63        |
